# Supplementary material
Source: ML conference proceedings conference paper supplement (https://openreview.net/forum?id=HpLOYOBbnt)
Supplement: supplementary_material [file attachment]

## A APPENDIX

### A.1 SOFT STOCHASTIC POLICY GRADIENT THEOREM

To fit the new reward function definition, the following is the process of deriving the soft version of policy gradient. Let's first start with the derivative of the soft state value function. Note that

$$\begin{aligned}
& \nabla_{\theta} V_{\text{soft}}^{\pi_{\theta}}(s) \\
&= \nabla_{\theta} \sum_a \pi_{\theta}(a|s) Q_{\text{soft}}^{\pi_{\theta}}(s, a) \\
&= \sum_a \left( \nabla_{\theta} \pi_{\theta}(a|s) Q_{\text{soft}}^{\pi_{\theta}}(s, a) + \pi_{\theta}(a|s) \nabla_{\theta} Q_{\text{soft}}^{\pi_{\theta}}(s, a) \right) \\
&= \sum_a \left( \nabla_{\theta} \pi_{\theta}(a|s) Q_{\text{soft}}^{\pi_{\theta}}(s, a) + \pi_{\theta}(a|s) \nabla_{\theta} (r^{\pi_{\theta}}(s, a) + \gamma \mathbb{E}_{s' \sim p(s'|s, a)} V_{\text{soft}}^{\pi_{\theta}}(s')) \right) \\
&= \sum_a \left( \nabla_{\theta} \pi_{\theta}(a|s) Q_{\text{soft}}^{\pi_{\theta}}(s, a) + \pi_{\theta}(a|s) \nabla_{\theta} (r^{\pi_{\theta}}(s, a) + \gamma \sum_{s'} p(s'|s, a) V_{\text{soft}}^{\pi_{\theta}}(s')) \right) \\
&= \sum_a \left( \nabla_{\theta} \pi_{\theta}(a|s) Q_{\text{soft}}^{\pi_{\theta}}(s, a) + \pi_{\theta}(a|s) \nabla_{\theta} \sum_{s'} (r(s, a) + p(s'|s, a) (\alpha \mathcal{H}(\cdot|s') + \gamma V_{\text{soft}}^{\pi_{\theta}}(s'))) \right) \\
&= \sum_a \left( \nabla_{\theta} \pi_{\theta}(a|s) Q_{\text{soft}}^{\pi_{\theta}}(s, a) + \pi_{\theta}(a|s) \sum_{s'} p(s'|s, a) (\alpha \nabla_{\theta} \mathcal{H}(\cdot|s') + \gamma \nabla_{\theta} V_{\text{soft}}^{\pi_{\theta}}(s')) \right) \\
&\quad \text{recursively replace } V_{\text{soft}}^{\pi_{\theta}}(\cdot) \text{ by the right side expression} \\
&= \sum_x \sum_{t=0}^{\infty} \gamma^t P(s \rightarrow x, t, \pi_{\theta}) \left( \sum_a \frac{\partial \pi_{\theta}(x, a)}{\partial \theta} Q_{\text{soft}}^{\pi_{\theta}}(x, a) + \alpha \sum_a \pi_{\theta}(x, a) \sum_{x'} p(x'|x, a) \nabla_{\theta} \mathcal{H}(\cdot|x') \right)
\end{aligned}$$

where  $P(s \rightarrow x, t, \pi_{\theta})$  is the probability of going from state  $s$  to state  $x$  in  $t$  steps under policy  $\pi_{\theta}$ , and

$$\sum_{t=0}^{\infty} \gamma^t P(s \rightarrow x, t, \pi_{\theta}) := d^{\pi_{\theta}}(s)$$

is the stationary distribution of Markov chain for  $\pi_{\theta}$ . Now let's consider the object function given by

$$\begin{aligned}
J^{\text{soft}}(\theta) &= \mathbb{E}_{\tau \sim p(\tau|\theta)} [r^{\pi}(\tau)] \\
&= \mathbb{E}_{\tau \sim p(\tau|\theta)} \left[ \sum_{t=0}^{\infty} \gamma^t (r(s_t, a_t) + \alpha \mathcal{H}(\cdot|s_{t+1})) \right] \\
&= \mathbb{E}_{s_0 \sim D} V_{\text{soft}}^{\pi_{\theta}}(s_0),
\end{aligned} \tag{18}$$

where  $D$  is the initial state distribution and is independent of  $\theta$ . The gradient of the object function is given by

$$\begin{aligned}
\nabla_{\theta} J^{\text{soft}}(\theta) &= \nabla_{\theta} \int_{s_0} D(s_0) V_{\text{soft}}^{\pi_{\theta}}(s_0) ds_0 \\
&= \int_{s_0} D(s_0) \nabla_{\theta} V_{\text{soft}}^{\pi_{\theta}}(s_0) ds_0 \\
&\propto \nabla_{\theta} V_{\text{soft}}^{\pi_{\theta}}(s_0).
\end{aligned} \tag{19}$$

The gradient is proportional to the derivative of state value  $V_{\text{soft}}^{\pi_\theta}(s_0)$  with respect to  $\theta$ , where  $\nabla_\theta V_{\text{soft}}^{\pi_\theta}(s)$ ,  $\forall s \in \mathcal{S}$ , has already been obtained. Hence, the soft policy gradient is

$$\begin{aligned}
\nabla_\theta J(\theta) &\propto \nabla_\theta V^{\pi_\theta}(s_0) \\
&= \sum_x \sum_{t=0}^{\infty} \gamma^t Pr(s_0 \rightarrow x, t, \pi_\theta) \left( \sum_a \frac{\partial \pi_\theta(x, a)}{\partial \theta} Q_{\text{soft}}^{\pi_\theta}(x, a) + \alpha \sum_a \pi_\theta(x, a) \sum_{x'} p(x'|x, a) \nabla_\theta \mathcal{H}(\cdot|x') \right) \\
&= \sum_s d^{\pi_\theta}(s) \left( \sum_a \frac{\partial \pi_\theta(s, a)}{\partial \theta} Q_{\text{soft}}^{\pi_\theta}(s, a) + \alpha \sum_a \pi_\theta(s, a) \sum_{s'} p(s'|s, a) \nabla_\theta \mathcal{H}(\cdot|s') \right) \\
&= \sum_s d^{\pi_\theta}(s) \left( \sum_a \frac{\pi_\theta(s, a)}{\pi_\theta(s, a)} \frac{\partial \pi_\theta(s, a)}{\partial \theta} Q_{\text{soft}}^{\pi_\theta}(s, a) + \alpha \sum_a \pi_\theta(s, a) \sum_{s'} p(s'|s, a) \nabla_\theta \mathcal{H}(\cdot|s') \right) \\
&= \mathbb{E}_{s \sim \rho^{\pi_\theta}, a \sim \pi_\theta} \left[ \nabla_\theta \log \pi_\theta(a|s) Q_{\text{soft}}^{\pi_\theta}(s, a) + \alpha \sum_{s'} p(s'|s, a) \nabla_\theta \mathcal{H}(\cdot|s') \right] \\
&= \mathbb{E}_{(s, a, s') \sim \beta^{\pi_\theta}} \left[ \nabla_\theta \log \pi_\theta(a|s) Q_{\text{soft}}^{\pi_\theta}(s, a) + \alpha \nabla_\theta \mathcal{H}(\cdot|s') \right]
\end{aligned}$$

## A.2 HYPERPARAMETERS FOR EXPERIMENTS

Table 2 lists the SSPG parameters used in the comparative evaluation in Figure 1. All the environments are in MuJoCo version 2.0.

Table 2: SSPG Hyperparameters.

| Environment                            | HalfCheetah                               | Ant | Hopper | Reacher | Walker2d | Swimmer | Humanoid |
|----------------------------------------|-------------------------------------------|-----|--------|---------|----------|---------|----------|
| Q function network                     | Two hidden layers, hidden-dim = 256, ReLU |     |        |         |          |         |          |
| Policy network                         | Two hidden layers, hidden-dim = 256, ReLU |     |        |         |          |         |          |
| replay buffer size $M$                 | 1e6                                       |     |        |         |          |         |          |
| action sample $N$                      | 1                                         |     |        |         |          |         |          |
| batch size                             | 254                                       |     |        |         |          |         |          |
| discount factor $\gamma$               | 0.99                                      |     |        |         |          |         |          |
| learning rate                          | 3e-4                                      |     |        |         |          |         |          |
| target smoothing coefficient $\lambda$ | 0.005                                     |     |        |         |          |         |          |
| target update interval                 | 1                                         |     |        |         |          |         |          |
| temperature $\alpha$                   | 0.1                                       | 0.1 | 0.2    | 0.1     | 0.1      | 0.2     | 0.1      |

## A.3 MUJoCo ENVIRONMENT SPECIFIC PARAMETERS

Table 3: Environment Specific Parameters

| Environment    | Space Dimensions | Action Dimensions |
|----------------|------------------|-------------------|
| Swimmer-v2     | 8                | 2                 |
| Reacher-v2     | 11               | 2                 |
| Hopper-v2      | 11               | 3                 |
| Walker2d-v2    | 17               | 6                 |
| HalfCheetah-v2 | 17               | 6                 |
| Ant-v2         | 111              | 8                 |
| Humanoid-v2    | 376              | 17                |
